# Supplementary material for: Olfactory Receptor OR7A17 Expression Correlates with All-Trans Retinoic Acid (ATRA)-Induced Suppression of Proliferation in Human Keratinocyte Cells
Source: MDPI journal article supplement (doi:10.3390/ijms222212304), 2021-11-14
Supplement: s1 [file s1]

Supplementary Table S1. The reaction parameters for PCR and PCR primer information

| PCR condition        |                  |        |               |
|----------------------|------------------|--------|---------------|
| Step                 | Temperature (°C) | Time   | No. of cycles |
| Initial denaturation | 94               | 3 min  | 1             |
| Denaturation         | 94               | 15 sec | 40            |
| Annealing            | 60               | 30 sec |               |
| Elongation           | 72               | 20 sec |               |
| Final elongation     | 72               | 5 min  | 1             |
| Storage              | 8                |        |               |

| Gene name                      | Primer sequence (5' – 3')                                                        | Product size (bp) |
|--------------------------------|----------------------------------------------------------------------------------|-------------------|
| OR7A17                         | Forward – TGG AAC CAG AGA ATG ACA CAG G<br>Reverse - GAT GAG CAG ATT CCC GAG CA  | 134               |
| GAPDH                          | Forward – ACA ACT TTG GTA TCG TGG AAG G<br>Reverse - GCC ATC ACG CCA CAG TTT C   | 101               |
| GAPDH2<br>(supplementary data) | Forward –GGA GCC AGA TCC CTC CAA AAT<br>Reverse – GGC TGT TGT CAT ACT TCT CAT GG | 197               |

## Supplemental Fig. S1

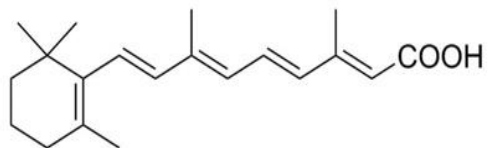

Supplemental fig. S1. Chemical structure of *All-trans* retinoic acid (ATRA).

Supplemental Fig. S2

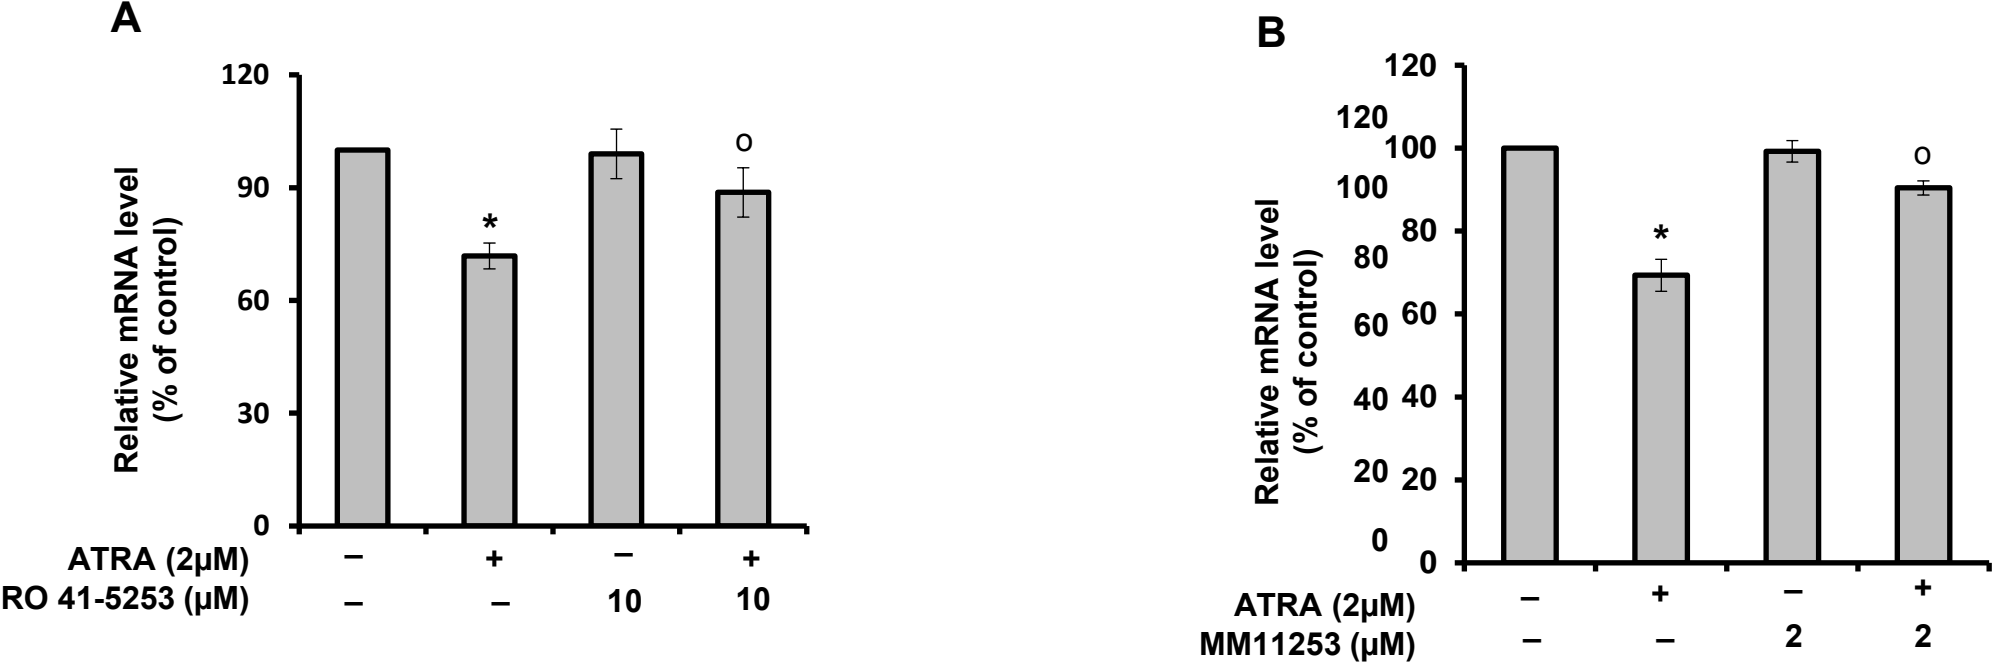

Supplemental Fig. S2. Effect of RO41-5253 and MM11253 on the reduced mRNA levels of OR7A17 induced by ATRA treatment. ,HaCaT cells were treated with 2 μM ATRA and either 10 μM RAR α antagonist (A) RO 41-5253 or 2 μM RAR γ antagonist (B) MM11253 for 24 h. After 24 h of incubation, the cells were lysed, and real-time PCR analysis was performed to determine the mRNA levels of OR7A17. Data are presented as the mean ± SEM of more than three independent experiments. \* p < 0.05 vs. control, ° p < 0.05 vs. ATRA-treated group.
